# Supplementary material for: Application of continuous renal replacement therapy (CRRT) in patients with severe acute pancreatitis: an analytical study
Source: BMC Gastroenterol. 2025 Aug 18;25:592. doi: 10.1186/s12876-025-04198-y (PMC12359950; doi:10.1186/s12876-025-04198-y)
Supplement: Supplementary file 1 — Supplementary Material 1 [file 12876_2025_4198_MOESM1_ESM.xlsx]

## Sheet: Sheet1
编号	要求3	要求31	训练集是否好转	测试集是否好转	年龄	性别	胰腺炎类型	是否RT	APACHE评分	Marshall评分	既往病史	强指征	RT启动时间	是否好转	吸氧浓度	氧分压	氧和指数	二氧化碳分压	血钾	血钠	乳酸	血钙	剩余碱	肺泡氧分压	白蛋白	总胆红素	ALT	AST	肌酐	尿素	尿酸	总胆固醇	甘油三酯	血淀粉酶	白细胞	血红蛋白	血小板	PT	INR	TT	D_二聚体	CRP	APTT	PCT	CK	CKMB	尿淀粉酶	HBP	肌钙蛋白T
1					46	男	胆源性	否	15	2	无			好转
2					67	男	高脂血症性	否	18	2	无			好转
3					56	男	胆源性	否	25	8	无			不良
4					39	男	胆源性	否	19	8	无			不良
5					68	女	胆源性	否	22	4	无			不良
6					41	女	胆源性	否	11	3	无			好转
7					59	女	胆源性	否	24	4	无			好转
8					76	男	胆源性	否	8	2	有			好转
9					55	男	其他原因	否	10	2	无			好转
10					84	男	胆源性	是	26	6	有	有	11	不良	41	52	126.83	33	2.7	123	5.8	0.2	-9.2	253	30.4	243.4	126	213	293	16.8	462	2.42	2.66	1420	14.2	131	3	18.7	1.65	12.6	4009	254	55.7	75.6	54	3.8
11					73	女	胆源性	否	12	3	无			好转
12	1	1	2		44	男	酒精性	是	13	4	无	无	58	不良	33	112	339.39	32	3.8	134	1.4	1.27	-8	85	35.1	18.6	70	85	52	4.6	72	15.2	29.2	641	24.8	178	163	12.5	1.11	18	362	303	30.1	11.58	472	93.4
13	1	1	1		27	女	酒精性	是	19	7	无	无	27	好转	40	177	442.5	29	3.1	142	3.5	0.76	-15.3	253	37.2	16.9	38	60	40	2.5	147	2.94	1.61	605	22.3	123	392	11.8	1.04	19.5	387	155.91	31.3	0.38	63	14.1
14					81	女	胆源性	否	7	3	无			好转
15	1	1	1		72	男	胆源性	是	8	6	有	无	21	好转	33	74	224.24	31	3.5	139	1.9	0.8	-1.4	206	34.1	38.1	41	30	103	12.6	518	4.13	1.93	168	9.3	112	96	11.2	0.99	15.3	6083	246.5	33.1	2.46	80	26
16					74	女	胆源性	否	12	3	有			好转
17	1	1	1		47	女	高脂血症性	是	15	6	有	无	34	好转	40	81	202.5	29	4.3	134	1.2	0.5	-8.6	119	24.3	8.4	5	75	82	14.1	402	12.71	33.4	271	9.9	131	222	10.6	0.93	14.5	841	200	29.5	0.88	219	9.4	9272
18					62	女	其他原因	是	49	10	有	有	70	不良	40	82	205	18	3.5	126	7.1	0.82	-20	194	29.7	40.1	296	706	108	6.1	249	1.43	0.77	149	17.1	133	102	18	1.56	25.4	3088	54.2	55.4	1.08	384	12	371
19					33	男	高脂血症性	是	17	3	有	有	12	好转	33	124	375.76	42	3.4	168	1.3	1.1	-2.4	192	44.7	6	41	60	137	9.8	1059	6.85	10.79	481	19.3	177	320	10.8	0.95	13.8	221	117	25.8	0.62	92	10.8
20					73	男	胆源性	否	9	3	有			不良
21					77	女	胆源性	否	8	2	有			好转
22					83	男	胆源性	否	13	3	有			不良
23	1	2		1	86	女	胆源性	是	17	9	无	无	19	好转	45	91	202.22	32	4.1	137	3.3	0.68	-3.6	284	27.7	36.4	152	180	66	5.3	124	1.37	0.59	1522	22.4	89	159	13.3	1.19	17.4	12104	193	34.7	6.75	748	7
24					62	男	胆源性	否	6	3	无			好转
25					47	男	胆源性	是	48	12	无	有	9	好转	100	304.6	304.6	69.1	4.8	146.3	14.2	0.82	-16.4	334	25.3	69.3	4630	10820	444.9	11.86	734	1.2	1.17	1739	18.5	148	143	19.8	1.78	12	11147	110.1	31.2	9.4	1453	59.1
26	1	1	1		39	男	高脂血症性	是	9	4	无	无	11	好转	33	122.5	371.21	31.3	3.39	134.2	2.5	0.44	-9.2	201	35.9	17.5	33	45	137.5	7.6	252	13.93	23.7	543	11.4	192	262	13.5	1.21	14.8	832	529	30.6	0.39	285	41.7
27	1	2		2	73	男	胆源性	是	15	7	有	无	244	不良	60	112.6	187.67	34.5	3.01	153	5.6	0.96	-5.7	397	27.6	47.6	61	82	108.6	18.35	116	2.03	2.95	588	12.5	85	52	13.3	1.2	16.9	591	198	20.9	0.66	362	20.1
28					65	男	胆源性	否	5	5	有			好转
29	1	1	2		20	男	胆源性	是	10	8	有	无	39	不良	80	60.1	75.13	37.2	5.43	133.7	2.2	0.59	-4.3	542	30.9	17.9	25	40	73.3	6.38	154	3.1	1.87	193	17.8	142	175	13.2	1.19	18.5	3129	322	33.5	2.93	1204	24.7
30					87	女	胆源性	否	6	3	无			好转
31					66	男	胆源性	是	21	9	无	有	10	不良	40	99.7	249.25	26.2	3.78	132.5	16.3	0.76	-8.3	260	27.6	132.3	2316	1088	230.5	6.79	437	2.14	0.63	1159	15.5	141	131	95.6	8.43	18.6	5134	18.3	58.4	0.97	590	47.3	933
32					67	女	胆源性	否	16	4	无			好转
33					88	男	胆源性	否	11	3	有			好转
34	1	1	1		26	男	胆源性	是	15	6	无	无	21	好转	33	244.9	742.12	29.4	3.47	134.4	2.3	1.14	-10.8	242	34.6	11.1	36	12	78.3	10.28	289	4.84	3.72	1481	33.6	157	271	11.8	1.06	14.2	242	63.9	35.8	0.28	141	12.5	3031
35					60	女	胆源性	否	12	4	有			不良
36					44	男	胆源性	否	9	2	有			好转
37					67	女	高脂血症性	否	24	7	有			不良
38					45	男	胆源性	是	20	10	有	有	70	不良	33	126.1	382.12	38.9	6.03	131.5	3.4	0.73	-7.2	188	23	68.8	767	4214	438.6	13.56	509	5.49	13.04	499	26.5	186	180	12.6	1.13	14.6	3485	238	31.9	2.13	173	25	304
39					59	女	胆源性	是	18	2	有	有	50	好转	33	118.3	358.48	16.5	3.19	132.3	9.2	1.04	-15.6	218	29.8	75.1	469	12990	192.9	9.94	552	2.36	0.89	268	15.1	74	67	21.2	1.84	26	1738	24.6	55	1.51	819	511.8
40					68	女	高脂血症性	是	11	4	有	有	118	好转	40	151.6	379	21.7	1.86	139	1.7	0.62	-16.4	261	32.1	30.5	208	166	85.2	7.46	139	3.39	1.51	1100	16.7	174	150	13.3	1.17	14	1998	253.5	33.5	1.8	92	70.4	6440
41					35	男	其他原因	是	19	2	有	有	40	好转	40	41.6	104	49.6	4.54	150.6	3.6	1.02	1.2	231	34.1	13.3	139	115	360.3	7.53	366	2.8	5.15	480	14.8	158	161	21.2	1.83	15.6	2914	51.8	46.4	0.3	3126	297.3
42					42	女	其他原因	否	15	4	无			好转
43					48	男	酒精性	否	9	5	无			不良
44	1	1	1		42	女	高脂血症性	是	10	5	有	无	16	好转	33	77.1	233.64	32.5	3.01	140.1	1.4	0.81	-7.1	205	24.7	9.2	20	23	31.3	1.43	47	7.21	7.97	194	10.8	114	295	12.3	1.09	13.9	2650	288.4	31.3	3.1	134	46
45					50	男	胆源性	否	16	4	有			好转
46					29	男	其他原因	否	11	3	有			不良
47					61	男	其他原因	否	8	4	无			好转
48					58	男	其他原因	否	5	2	无			不良
49					73	女	其他原因	否	10	3	有			好转
50					65	男	酒精性	是	12	3	有	有	54	不良	50	65.4	130.8	46.4	3.26	148.5	2	0.62	3.5	237	28.1	32.6	134	168	245.8	27.65	416	3.57	4.92	516	31.8	137	228	21.2	1.85	16.1	852	68.5	28.6	0.84	642	36.5
51					34	男	胆源性	是	20	5	有	有	21	好转	40	109.5	273.75	22.2	3.79	130.9	1	1.18	-16.7	259	29.2	11.4	30	28	132.7	10.69	273	2.84	2.35	178	10.5	114	101	13.1	1.15	14.8	745	291.5	31.9	2.34	128	13.6	251
52					64	男	胆源性	是	16	4	有	有	54	不良	40	85.4	213.5	19.7	4.33	136.2	3.1	0.44	-13.1	264	27.4	54.9	93	158	259	17.08	251	3.06	1.59	1235	8.9	111	162	12.4	1.09	17.1	6180	208	33.1	37.9	3092	94.2
53	1	2		2	63	男	胆源性	是	8	3	无	无	57	不良	33	98.3	297.88	38.4	3.54	138.5	1.8	0.78	-0.4	192	41.5	58.6	43	147	110	6.31	370	3.91	1.25	2015	12.3	166	170	14.6	1.28	20.4	869	109	23.3	6.17	132	37.6
54	1	1	1		83	女	其他原因	是	15	4	有	无	56	好转	60	86.8	144.67	31.5	4.08	123.6	1.6	0.49	-3.1	398	22.8	9.7	21	18	51	2.24	74	2.58	0.52	83	8.1	90	217	16.2	1.41	18.6	1163	162.6	37.3	2.27	51	24.6
55					56	男	其他原因	否	13	3	无			不良
56					23	女	胆源性	否	2	3	无			好转
57	1	1	1		46	男	胆源性	是	8	4	无	无	11	好转	61	54.7	89.67	30.8	2.83	132.5	3.6	1.01	-0.8	410	25.8	20.1	136	26	54.8	4.71	120	4.03	1.53	133	13.5	130	191	14.7	1.29	11.8	935	224	26.4	0.34	47	21.9
58	1	1	2		48	男	酒精性	是	18	5	无	无	51	不良	40	139.3	348.25	35.2	3.65	137	1.6	0.47	-8.9	248	10	30.1	15	35	130.6	13.09	384	1.93	2.13	585	9.6	127	123	15.1	1.33	22.6	2720	460	36.4	4.08	291	19
59					40	男	高脂血症性	是	20	4	有	有	18	好转	33	175	530.3	32.2	6.38	129.2	3.1	0.7	-9.5	200	31.6	32.6	19	131	160.8	5.88	293	6.38	41.2	1760	22.7	170	335	10.1	0.9	13.1	62	405	31.3	8.47	161	47.4
60					71	男	胆源性	否	12	2	无			好转
61					67	男	胆源性	否	7	2	有			不良
62					81	男	胆源性	是	25	5	有	有	10	好转	21	157.2	748.57	27.5	3.72	138.2	6.1	0.91	-11.4	157	27.4	80.2	140	201	239.7	17.18	516	1.14	0.53	292	28.2	121	53	19	1.66	33.5	15436	119.7	66.5	100	3570	37
63					77	男	胆源性	是	23	6	有	有	50	不良	60	113.3	188.83	22.9	5.01	145	20	0.64	-22	404	32.5	6.5	12	24	413	17.23	463	4.45	6.13	83	18.6	85	163	16.1	1.83	18.9	387	187	31.3	0.99	253	12.4
64	1	1	2		61	女	胆源性	是	21	5	无	无	37	不良	45	70.1	155.78	28.7	3.05	131.4	3.2	0.88	-7.5	290	21.8	9.2	20	24	41.6	3.57	68	3.06	1.2	377	10.2	103	291	12.7	1.12	14.8	1752	170	24	8.78	92	10.2
65	1	1	1		58	男	胆源性	是	12	6	有	无	7	好转	60	67.6	112.67	31.5	4.06	143.8	1.5	0.87	-7.8	391	28.4	48.3	44	29	102.1	11.84	289	2.55	1.22	175	15.8	138	138	14.2	1.25	15.6	1483	401.7	38.4	0.97	72	23.6
66					73	男	胆源性	否	8	2	无			好转
67					76	男	胆源性	否	10	3	有			不良
68	1	2		1	28	男	胆源性	是	6	3	无	无	126	好转	33	119.4	361.82	38.1	4.44	130.1	2.1	0.84	0.3	190	32.9	41.5	87	88	34.3	3.99	52	4.64	0.76	226	6.6	124	80	42.8	2.05	19.3	435	7.4	34.3	0.17	81	9.6
69					83	女	胆源性	是	26	3	无	有	23	好转	40	127.8	319.5	39.7	4	143.4	8.4	0.65	3.2	237	27	28	63	261	293.8	23.25	422	1.69	0.61	489	14.2	84	43	15.4	1.35	18.9	1751	171	33.1	6.4	1013	58
70					46	男	高脂血症性	是	17	4	有	有	48	不良	40	104.6	261.5	35.7	4.38	138.4	3.6	0.89	-7.6	244	27.1	8.7	16	31	304.9	15.33	392	5.07	5.02	1775	18.2	185	318	14.4	1.26	13.3	1156	408	33.6	4.89	159	14.1
71	1	1	2		78	男	酒精性	是	20	2	有	无	47	不良	40	172.6	431.5	51.5	3.55	137.9	2.9	1.06	-3.4	230	23.6	12.2	202	39	129.1	5.13	230	2.68	0.72	931	17.1	134	184	12.2	1.07	15.3	7113	98.7	31.8	14.19	7947	175
72					79	女	胆源性	否	8	2	有			好转
73	1	1	1		30	女	高脂血症性	是	12	3	有	无	226	好转	21	129.1	614.76	27.2	3.63	131.2	0.6	0.93	-10.8	206	23.5	5.8	12	22	18.8	1.58	241	20.36	25.69	229	12.1	138	243	12.1	1.06	19.3	360	399	30.3	0.69	123	6
74	1	1	2		55	女	其他原因	是	9	2	有	无	32	不良	21	81.4	387.62	27.2	3.52	136.6	4.5	0.77	-7.5	122	23.2	7.3	12	24	35.7	2.82	116	12.28	45.4	668	12.2	115	140	10.9	0.96	14.5	534	109.2	29.4	3.41	69	2.7
75					34	男	胆源性	否	12	4	无			好转
76					24	男	高脂血症性	是	10	3	有	有	35	好转	33	130.1	394.24	14.8	2.73	146.8	1.2	1.14	-18	219	34.4	9.8	45	37	62.9	3.54	777	14.72	13.8	372	18.8	148	281	12.5	1.1	13.4	672	211	30	0.27	86	17.4
77	1	1	1		31	男	高脂血症性	是	21	2	有	无	1	好转	33	89	269.7	41	3.6	142	1.2	0.99	1.3	192	30.8	14.5	15	19	54	4.27	199	11.99	34.29	1039	14.8	171	181	15.4	1.34	12	237	223.29	57.7	0.38	81	22.3
78	1	1	2		37	女	高脂血症性	是	22	5	无	无	39	不良	33	185	560.61	28	3.9	132	1.4	0.65	-7.6	189	21.6	9.1	7	15	38	3	162	4.74	6.43	126	2.9	71	113	15.7	1.37	21.7	7255	184.77	32.2	1.05	46	11
79					15	女	其他原因	否	10	2	无			好转
80					89	男	胆源性	否	16	3	无			不良
81					75	男	其他原因	否	13	2	无			好转
82					40	男	其他原因	是	15	3	无	有	22	好转	33	118.8	360	41.1	4.14	134	2.5	0.93	-2.9	185	34.2	11	19	19	356.4	13.83	359	5.97	8.15	1048	6.2	109	83	14.1	1.22	12	2444	311.8	29.7	2.83	108	5.8
83					45	女	胆源性	是	14	5	无	有	46	好转	17	174	1023.53	34	4.4	133	3.3	1	-12.6	284	30.4	28.1	37	18	406	16.9	457	2.96	2.45	243	9.3	121	342	13.1	1.14	12.9	5768	226.21	24	2.98	50	6.7
84	1	1	1		55	男	胆源性	是	20	2	无	无	81	好转	40	71	177.5	39	3.1	137	1.2	0.76	-0.8	244	27.8	51.1	30	36	60	4.9	127	1.87	1.5	64	9.7	113	114	13.8	1.2	12.5	2191	210.72	30.5	0.19	140	7
85					79	男	其他原因	否	10	2	无			好转
86					57	男	其他原因	是	21	3	无	有	9	不良	40	370.1	925.25	11.4	4.57	136.9	20	0.8	-22.4	370	30.1	171.8	1977	1165	54.9	1.51	288	2.09	1.03	335	13.8	130	131	43.6	3.98	21.7	3095	13.5	53.7	0.46	885	55.3
87					62	男	胆源性	否	10	2	无			不良
88					75	女	胆源性	否	4	3	无			不良
89					74	男	高脂血症性	否	14	4	无			好转
90					35	男	胆源性	是	20	4	无	有	104	好转	21	59.1	281.43	26.9	4.4	133.2	1.2	0.69	-11.7	256	28.7	45.9	76	64	629.7	37	595	4.35	2.22	1181	13.8	72	204	14.4	1.24	16.3	2861	235	32.9	8.54	332	17.3	1103		0.03
91	1	1	1		85	男	胆源性	是	8	3	有	无	34	好转	33	77	233.33	36.6	3.2	142.3	1.5	1.02	-3.4	197	29.3	19.8	64	31	110.4	8.46	316	2.58	0.77	167	28	129	199	12.9	1.11	12.5	3125	415	25.7	0.21	207	14.1			0.03
92	1	1	2		35	男	其他原因	是	31	6	无	无	10	不良	40	125	312.5	24	4.3	137	1.6	0.42	-13.4	279	13.4	9.5	42	91	101	3.5	249	8.44	22.23	548	5.2	216	195	24.9	1.23	10	800	46.23	32.9	0.24	77	39
93					37	女	高脂血症性	是	37	7	有	有	50	不良	70	87	124.29	38.3	3.53	166.7	1.8	1.04	-11.9	465	28	8.8	91	282	331.9	18.53	816	2.13	2.02	1294	9.8	142	97	13.4	1.15	18	3048	235	27.2	2.8	11542	266.1
94					82	女	其他原因	否	25	3	有			不良
95					51	男	高脂血症性	是	18	5	无	有	32	好转	21	96	457.14	39	3.9	135	2.9	0.77	-11.2	122	22.9	6.5	93	113	355	9.6	583	4.52	5.23	347	10.9	136	103	116	1.05	14.6	574	223.22	33.7	6.73	437	28
96					68	男	酒精性	否	10	4	无			好转
97					65	男	其他原因	否	19	4	无			不良
98	1	1	1		58	男	高脂血症性	是	12	3	无	无	35	好转	33	63.6	192.73	32	3.05	132	1.6	0.68	-9	200	27.5	12.2	13	26	114	9.16	511	7.19	8.01	110	6	130	183	10.5	0.96	12.9	3532	304.4	28.5	4.06	536	5.22
99	1	1	1		25	女	高脂血症性	是	15	3	有	无	32	好转	33	137	415.15	61	1.5	156	1.9	1.01	-2.5	28	41.2	4.9	43	55	40	4.5	449	18.03	18.68	159	20.2	171	269	11.4	1.03	15.9	680	150.17	30.5	0.6	41	9.7
100	1	1	2		58	男	酒精性	是	11	5	无	无	48	不良	30	271	903.33	17	3.5	142	2.7	0.7	-10.5	280	20.6	61.8	115	43	131	5.6	340	9.01	24.61	190	4.3	105	113	13.8	1.24	13.9	1184	183.47	44.2	0.41	181	28
101					74	男	其他原因	否	43	3	无			好转
102					20	男	高脂血症性	否	17	5	有			好转
103					73	男	胆源性	是	25	6	有	有	48	好转	50	101.8	203.6	48.8	4.27	146.4	3	0.65	-4.4	302	29.9	28.2	158	290	349.7	26.7	395	2.34	2.02	516	9.4	115	113	14.4	1.3	18.1	4802	252.6	39	46.36	15850	424.8			0.83
104					48	男	其他原因	否	39	9	有			好转
105					34	男	其他原因	是	18	4	有	有	21	不良	30	181	603.33	30	4.9	127	6.8	0.56	-7.1	194	22.5	130.3	216	1186	264	8.9	283	1.84	2.26	277	7.2	178	67	12.2	1.12	14.5	2492	116.75	47.3	33.08	415	31.3
106	1	2		2	81	女	酒精性	是	16	6	有	无	46	不良	70	59.1	84.43	45.4	2.91	131.5	2	0.85	-1.2	448	28.6	8.7	144	86	66.4	8.27	232	3.57	1.1	208	12.4	112	254	11.8	1.07	13.9	7945	277	35.1	8.4	63	12			0.02
107	1	2		1	38	男	高脂血症性	是	2	3	有	无	20	好转	45	141.8	315.11	32.7	3.63	140.5	1	1.04	-4.4	280	35.6	18.5	22	19	65.4	3.29	401	6.85	10.79	61	9.8	139	188	13.1	1.19	13.4	2414	449	29.4	0.34	80	9.3
108					70	女	其他原因	否	8	3	有			好转
109					61	女	其他原因	否	6	3	无			好转
110	1	1	2		31	男	高脂血症性	是	28	3	有	无	81	不良	33	106	321.21	24.7	3.96	138	1.8	0.56	-6.2	205	28.7	39.5	42	15	140.7	10.09	463	1.93	2.13	155	11.2	158	155	12.3	1.12	15.8	2098	319	39.2	2.84	908	2.57
111	1	1	1		58	女	胆源性	是	9	3	无	无	55	好转	40	81.1	202.75	42.1	3.21	132.4	1	1.04	2.4	235	30	16.5	21	21	33.2	1.55	61	4.41	1.3	114	15.2	104	204	12.3	1.12	16.3	2385	309	24.7	0.35	88	10.2
112	1	1	1		62	男	胆源性	是	11	2	有	无	29	好转	40	66	165	24	4	148	1.2	0.72	-2.5	334	33	39.3	31	58	121	9.62	388	4.44	1.78	1311	18.3	154	198	12.9	1.18	15	922	350	26.8	3.18	454	12.3
113	1	1	1		27	男	酒精性	是	8	5	有	无	11	好转	40	157.8	394.5	12	3.87	138.9	4	1.08	-21	270	35.7	17.5	18	12	113.6	5.86	873	9.56	17.15	201	15.8	137	154	11.9	1.08	14.8	2044	538	30.6	2.31	58	6118		98.45
114					58	女	胆源性	否	7	2	无			好转
115	1	1	1		48	女	高脂血症性	是	10	2	有	无	57	好转	50	74	148	19	3.8	140	1.6	0.47	-7.3	218	29.2	8.7	8	32	83	6.2	292	12.7	24.74	591	12.1	156	261	12.1	1.11	15.8	177	42.71	28.1	3.43	405	21
116	1	1	1		16	男	高脂血症性	是	8	2	无	无	8	好转	33	35.4	107.27	38.3	4.24	137.1	3.9	0.75	-4.8	192	35.1	30.8	40	74	95.4	8.45	505	3.94	2.45	903	10	148	172	13.4	1.21	20.8	2789	331	28.1	1.12	233	1.21		51.59
117					74	男	其他原因	否	15	3	有			不良
118					30	男	其他原因	否	4	3	无			不良
119					57	男	胆源性	是	13	6	有	有	246	好转	33	80.7	244.55	32.3	3.64	131.7	1	0.86	-7.6	198	32.1	787.9	120	97	238.6	15.68	120	4.29	0.91	821	15	106	116	21.9	1.96	17	3131	171.2	41.1	2.65	108	12		172.31
120					73	女	胆源性	是	26	7	有	有	586	不良	70	71.6	102.29	31.4	4.72	132.6	3.7	0.9	-9.2	469	29	31.8	11	26	391.3	41.58	634	2.05	1.5	588	11.1	65	208	22.5	1.92	18.2	4793	253.6	43.6	8.79	110	1.32		153.41	0.14
121	1	1	1		47	男	高脂血症性	是	17	4	有	无	17	好转	33	79.1	239.7	29.5	4.02	129.5	3.4	0.78	-9.3	204	30.5	23.1	21	43	52	2.21	190	9.03	19.43	21	14.9	131	223	12.6	1.14	13.1	526	298	38.6	1.11	61	0.79		228.68
122					64	女	胆源性	否	15	3	有			好转
123					84	男	胆源性	否	11	3	有			不良
124					28	男	高脂血症性	是	14	6	有	有	10	不良	40	91.6	229	55.3	4.56	140.3	1.2	0.66	-9.7	224	34.6	14.7	646	1366	564	18.04	466	5.78	7.27	1124	15.1	105	79	9.9	0.87	21.1	958	109.3	27.8	100	5195	69.8		300	0.06
125	1	1	1		32	男	胆源性	是	7	2	无	无	9	好转	50	83.4	166.8	37	3.47	135.7	1.2	1.04	-1.5	318	30.9	32.3	56	25	62.7	4.72	313	1.96	0.62	206	17.8	135	127	14.4	1.25	16.6	2342	243	32.2	0.62	41	1.51		193.55
126					45	女	胆源性	否	10	2	无			好转
127					42	女	胆源性	否	14	5	无			好转
128					89	男	其他原因	否	18	4	有			不良
129	1	1	2		29	男	高脂血症性	是	15	5	有	无	49	不良	45	99	220	47.3	3.5	137.4	1.8	1.08	-0.2	271	25.9	88.6	17	32	144.3	8.91	173	1.98	5.07	126	13	82	160	16.5	1.43	14.4	3467	172.7	40.5	5.44	27	8.6		79.36	0.03
130	1	1	1		54	男	高脂血症性	是	8	2	无	无	31	好转	47	91.6	194.89	33.9	3.67	140	1.4	0.71	-4.3	301	27.8	10.4	20	26	53	6.36	298	9.08	15.12	251	5.1	138	163	12.5	1.09	13.2	1394	179.7	30.4	5.91	145	3.4		80.33	0.01
131					54	男	其他原因	否	10	2	有			好转
132					53	男	胆源性	否	13	3	有			好转
133	1	1	1		27	男	高脂血症性	是	8	2	无	无	2	好转	33	63	190.91	38.7	3.36	126.2	2	0.94	2	192	34.5	17.2	17	56	72.2	5.19	427	4.86	5.07	231	8.8	100	239	13.2	1.15	12.7	3544	221.6	24.4	0.33	350	1.11		154.38
134	1	1	1		59	女	高脂血症性	是	18	5	有	无	15	好转	33	91	377.88	31	3.7	132.6	1.5	0.59	-19.3	192	30.4	15.9	23	48	133	6.99	569	14.79	43.09	35	12	139	283	14.6	1.33	40	1104	271.2	30.3	0.23	162	5.3
135					45	男	胆源性	是	37	6	有	有	8	不良	33	125.1	379.09	21.6	4.59	126.3	12	0.82	-14.1	212	31.1	112.5	6738	5501	354.6	9.38	612	1.96	1.52	231	5.5	107	101	98.3	7.91	26.6	2364	2.3	42.4	1.93	182	30.6		15.67
136					80	男	胆源性	否	7	3	有			好转
137					72	男	其他原因	是	15	4	有	有	102	不良	40	67	138.4	33	3.7	133	2.1	1.02	0.4	190	20.8	39	1	20	449	15.99	46	0.85	0.37	48	15.1	108	118	51.8	4.9	14.5	1083	112.56	56.7	2.65	121	5.4
138					49	男	其他原因	是	12	7	有	有	55	不良	50	91	457.14	40	4.6	141	1.4	1.06	-4.9	356	27.6	36.3	4	25	403	21.32	326.9	6.22	3.2	175	9.5	102	166	7.8	0.65	27.7	516	114.46	64.9	0.8	452	48.17
139					84	男	胆源性	否	13	3	有			不良
140	1	1	1		26	男	胆源性	是	17	5	无	无	32	好转	40	125	457.14	40	4.3	136	1.9	0.99	-8.9	264	29.5	56.3	191	36	59	5.08	184.2	5.59	2.56	518	21.8	189	206	13.8	1.27	12.5	636	139.49	37.3	7.55	527	17.1	19057
141	1	1	2		78	女	胆源性	是	23	4	有	无	13	不良	37	63.8	172.43	28.9	4.23	149.4	4.4	0.85	-8.4	227	27	29.7	25	38	89.3	12.57	400	6.85	10.79	414	15.9	110	126	13.7	1.19	18.9	6654	123	25.9	1.72	220	5.2		106.05
142					69	男	其他原因	否	14	3	有			好转
143	1	1	2		53	女	其他原因	是	20	5	有	无	54	不良	40	139	347.5	35.5	3.49	142.2	3.2	0.96	1.3	244	22.6	7.4	31	46	81.7	10.53	220	4.29	1.69	174	7.2	142	334	12.6	1.1	16.1	440	5.1	65.6	1.97	108	2.57		22.13
144					57	女	胆源性	否	15	2	无			不良
145	1	1	1		38	男	高脂血症性	是	2	2	有	无	13	好转	33	133.8	224	21.8	3.57	145.4	1	1.1	-14.1	208	39.2	26.8	18	11	58.3	8.1	1081	9.26	6.25	242	9.7	142	231	11.8	1.03	14.5	638	73.2	24.1	5.22	88	2.18		22.28
146	1	1	1		45	男	高脂血症性	是	6	2	有	无	14	好转	33	124.7	377.88	36.2	4.01	134.8	1.3	0.94	-2.3	192	35.7	17	23	27	41.3	1.45	162	23.2	103.2	90	9.6	124	259	11.1	0.97	12.1	442	363	31.2	0.33	72	3.1		92.83
147					59	女	胆源性	否	15	2	无			好转
148					82	男	胆源性	否	8	3	有			好转
149	1	1	2		33	女	胆源性	是	8	2	无	无	130	不良	33	67.2	203.64	45.4	2.92	136.9	1	0.41	0.1	184	29.4	12.9	40	20	37.1	1.72	87	5.45	1.15	1679	22.3	116	237	11.6	1.02	14	303	334	37.3	5.59	81	9.4	13500	300
150	1	1	2		81	男	其他原因	是	22	5	有	无	48	不良	33	82	107.27	36	4	135	1.9	0.54	0.2	189	25.5	28.6	21	36	139	5.78	133	1.54	2.13	13	4	158	222	16.6	1.36	20.8	4.68	208.9	131.8	9.35	109	9.3
151					81	男	其他原因	否	8	2	有			不良
152	1	1	1		22	男	高脂血症性	是	11	5	有	无	34	好转	37	101.7	274.86	23.8	4.17	144.8	1.9	0.87	-1.3	28	32.5	44.8	25	42	163.4	14.04	770	6.92	7.08	518	8	161	271	17.1	1.48	14.5	1740	200	27.9	0.61	307	9.3			0.01
153	1	1	1		33	女	高脂血症性	是	7	4	有	无	159	好转	33	98	296.97	43.1	3.35	133.2	1.4	1.19	3.1	65	33	10.2	28	26	40.4	1.58	71	4.46	2.98	48	14.7	94	205	12.8	1.12	13.2	3323	231	28	0.96	365	4.3		300
154	1	1	1		49	男	高脂血症性	是	13	2	无	无	16	好转	33	97.3	294.85	36.4	4.17	135.2	2.3	0.81	-4.4	196	32.6	29.1	33	35	62.4	2.92	221	7.2	10.67	502	12.3	129	147	13.5	1.17	30.3	720	200	33.7	15.74	174	46.3		146.82
155	1	2		1	57	男	高脂血症性	是	14	3	有	无	32	好转	40	91.1	227.75	38.8	4.26	135.4	1.2	0.57	2.4	57	32.3	14.9	13	13	55.3	4.99	294	11.65	14.11	135	1.5	137	144	11.6	1.02	14.2	2455	210.6	30.5	1.85	63	0.89		46.06	0.01
156					80	男	其他原因	是	28	6	有	有	36	不良	33	79.1	377.88	30	3.8	140	1.6	0.93	-10.5	204	22.5	20.3	24	84	484	56.26	555.5	2.02	357	35	13.6	73	239	18.5	1.57	22.9	4.01	218.6	62.4	12.34	28	2.7		48.94
157	1	1	2		40	女	胆源性	是	19	4	有	无	93	不良	40	72.4	181	38.5	3.35	138.9	1.4	0.42	0.8	248	33	30.7	14	28	38.1	3.13	60	7.12	8.66	41	25.7	62	309	13.2	1.15	16.1	1188	199	33.7	7.26	74	7		192.25
158					50	男	高脂血症性	否	25	7	有			不良
159					36	男	胆源性	是	14	4	无	有	34	好转	33	94.2	285.45	35.2	4.05	141	1.8	0.9	-5.9	197	33.6	45.6	327	107	289.5	14.24	415	4.2	2.16	641	19.7	137	132	18.5	1.59	17.3	656	391	34.7	0.26	58	2.7	2810
160	1	1	1		44	男	高脂血症性	是	5	3	无	无	10	好转	33	69	209.09	42.3	3.91	137.2	2	1.03	1.8	191	39.8	17.9	32	22	61.5	3.77	321	8.21	9.51	248	8.5	142	169	12	1.05	13.5	235	245	32.4	4.59	81	6.7		41.2
161					76	男	其他原因	是	14	2	有	有	206	好转	40	67.2	138.4	37	5	140	2.6	1.01	-3.5	397	29.8	34.7	45	118	359	35.87	634.1	2.95	1.81	45	19.5	61	33	16.1	1.49	21.3	2179	48.74	35	5.19	569	22.8
162					30	男	其他原因	是	16	6	有	有	24	不良	40	132.1	330.25	28.7	3.74	133	3.7	1.01	-26.9	254	38.4	14.2	306	716	264.3	23.88	821	2.97	2.94	1471	18.3	145	166	13.1	1.14	28	7006	80.1	38.5	37.29	6271	188.88		66.49	0.06
163	1	1	1		58	女	胆源性	是	7	4	有	无	236	好转	50	69.2	138.4	32.7	3.03	138.9	1.2	0.88	-3.5	324	30.6	20.9	26	13	59.8	1.68	157	2.22	1.53	26	16.8	74	452	15.6	1.35	19.3	3202	180.7	69.2	10.79	49	3.8		116.55
164					70	男	其他原因	否	12	3	有			好转
165					70	女	胆源性	否	15	4	无			好转
166					52	女	胆源性	否	20	6	无			不良
167					67	男	胆源性	否	12	3	有			好转
168					68	男	胆源性	否	16	5	有			好转
169					46	男	其他原因	否	17	5	有			好转
170					85	女	胆源性	否	14	5	有			不良
171					89	男	酒精性	否	12	3	有			好转
172					63	女	胆源性	否	14	4	有			好转
173					46	男	胆源性	否	10	2	有			不良
174	1	1	2		42	女	高脂血症性	是	18	4	无	无	56	不良	50	118	236	27	3.2	134	4.3	0.49	-12.7	204	28.6	17.8	22	66	42	3.5	112	4.81	5.14	487	11.1	123	295	14.2	1.25	13.4	1625	187	30	16	457	11
175					83	男	其他原因	否	8	2	有			好转
176					82	男	其他原因	否	16	5	有			好转
177					60	男	其他原因	否	10	2	无			不良
178	1	1	1		34	男	高脂血症性	是	9	2	有	无	16	好转	40	80	200	42	3.2	141	1.7	1.04	2.2	188	35.7	23.7	14	12	85	4.5	273	4.54	4.56	38	13.3	118	143	16.9	1.47	13.1	1346	419	42.8	2.71	57	1	102
179					78	男	酒精性	否	11	2	无			好转
180	1	1	1		50	男	高脂血症性	是	10	2	有	无	23	好转	40	88	220	42	4	136	1	0.82	2.7	262	29.7	11	10	27	48	5.3	151	4.45	6.13	1522	8.1	96	251	13.2	1.16	13.5	3172	128	26.2	1.29	320	4.1	89
181					44	男	高脂血症性	否	10	5	有			好转
182					40	男	酒精性	否	16	4	无			好转
183					80	男	其他原因	否	15	5	有			好转
184					63	男	胆源性	否	13	2	无			好转
185					66	男	胆源性	否	14	2	有			不良
186					80	男	胆源性	否	11	2	有			不良
187	1	1	2		74	男	胆源性	是	19	2	有	无	40	不良	40	83	207.5	39	5.3	134	1.2	0.4	3.1	404	27.7	8	19	42	53	4.2	109	2.6	1.08	53	19	149	120	13.9	1.21	13.8	3307	340	28.4	0.35	252	10.8
188	1	1	1		56	男	其他原因	是	15	4	无	无	12	好转	40	116	290	34	3.8	134	1.9	1.07	-6.8	195	24.6	25.3	34	98	118	11	189	2.44	2.73	71	26.8	66	278	13.5	1.18	13	1157	227	32.3	1.42	105	11
189					88	男	胆源性	否	18	4	有			不良
190	1	1	2		46	男	高脂血症性	是	14	3	有	无	43	不良	40	77	192.5	35	3.2	131	2.1	0.6	-10.8	200	25.8	15.5	16	64	85	6.9	300	11.29	16.21	491	7	124	150	14.8	0.89	13.1	1751	397	32.8	1.94	253	12.4
191					64	女	其他原因	否	20	6	有			不良
192					63	男	其他原因	否	10	3	无			不良
193					25	男	高脂血症性	是	18	5	有	有	24	好转	45	133	295.56	31	5.5	130	4.2	0.44	-9.6	200	32.5	41.1	22	141	313	18.3	415	7.51	16.2	872	11.9	200	154	10.6	0.94	28.5	537	128	32.4	48.65	642	39
194					62	男	其他原因	否	12	2	有			好转
195					22	男	高脂血症性	是	19	6	有	有	38	好转	40	123	307.5	29	4.8	150	1.4	1.08	-17.9	200	22.6	11.7	22	52	237	6.5	211	3.57	4.92	119	8.2	103	126	13.4	1.19	300	520	88.6	55.6	2.31	548	1
196	1	2		1	65	男	胆源性	是	21	5	有	无	56	好转	50	89	178	52	4.3	135	1	0.91	-4.4	324	29.1	20.7	14	17	44	2.4	233	2.06	1.34	83	16.2	102	98	22.4	1.86	14.8	4419	88.8	48.2	0.38	86	9.7
197	1	1	2		50	男	酒精性	是	17	4	有	无	10	不良	45	79	175.56	45	5.4	131	3.4	0.59	-11.6	191	25.8	50	37	83	170	7.6	183	11.56	30.05	491	17.3	127	196	22.1	1.04	21.1	904	286.87	32.9	34.43	472	23
198	1	1	1		41	男	高脂血症性	是	12	3	有	无	37	好转	50	82	164	31	3.4	139	1.9	0.49	-8.4	262	27.1	16.2	16	57	44	4.9	311	10.46	16.51	378	8.4	118	210	13.9	1.19	13.9	1519	288	28.9	3.85	270	14.9
199					64	男	其他原因	是	22	6	有	有	33	不良	45	70	155.56	43	4.9	133	2.2	1.12	3.4	284	41.2	90.8	81	214	728	19.7	239	3.67	1.64	3590	12.2	118	201	16.5	1.41	24.8	387	55.19	84.9	8.68	110	15.6
200					78	女	其他原因	是	16	4	有	有	8	好转	40	185	462.5	34	5.5	136	1.2	0.82	-3	396	32.4	18.1	138	237	322	19.1	371	4.91	0.71	2956	6.8	100	167	14.2	1.22	18	930	8.5	39.5	0.23	361	46.3
201					64	男	其他原因	是	23	6	有	有	16	不良	33	438	1327.27	41	6.3	133	9.9	0.62	-16.5	284	25.3	17.3	4351	7030	308	15.2	728	1.89	1.16	1995	11.3	142	87	27.5	2.33	23.6	4860	130	53.1	7.05	1081	93
202					64	男	胆源性	否	8	2	无			不良
203	1	1	2		85	男	胆源性	是	22	7	有	无	60	不良	40	106	265	28	3.7	140	1.5	0.73	-3.9	200	26.4	19.2	48	93	144	13.2	544	2.49	0.63	596	16.2	106	103	20.3	1.73	21	3572	24.74	43.7	1.96	726	144
204					62	男	其他原因	否	7	2	有			不良
205					48	男	胆源性	否	9	2	无			好转
206					71	女	胆源性	否	8	2	无			不良
207	1	1	1		55	男	胆源性	是	18	6	有	无	62	好转	50	67	134	57	3.57	141.5	1	0.7	-10.6	237	30	24.5	39	98	219	20.8	494	2.64	3.18	471	12.7	122	39	14.8	1.29	15.2	3450	492	30.3	2.12	2857	36.6
208					23	男	胆源性	是	19	5	有	有	50	不良	40	61	152.5	21	5.2	123	8	0.89	-15.7	253	39.5	135.3	1961	4093	203	15.2	931	2.75	0.85	32	18	137	188	25.2	2.26	15.7	2850	22.52	33	1.47	690	22.1
209					35	男	高脂血症性	是	20	6	无	有	39	不良	50	139	278	27	5.6	117	10.7	0.4	-17.9	318	33.8	32.9	11	81	143	9	317	30.53	23.47	673	5.1	201	255	17.8	1.57	24.4	560	274.72	145.8	7.01	1183	36.5
210					38	男	胆源性	否	8	2	无			不良
211	1	1	2		72	男	胆源性	是	11	3	有	无	206	不良	45	76	168.89	42	3.6	146	2.9	1.04	1.2	206	33.4	54.5	21	27	75	9.7	200	2.97	1.13	271	18.6	95	43	25.8	1.19	21.8	2590	65.21	37.6	0.39	109	1.32
212	1	1	2		54	男	胆源性	是	24	7	无	无	40	不良	40	79	197.5	31	3.9	137	2.2	0.46	-7.9	280	11.7	24.1	39	54	199	13.81	514	2.66	2.28	978	23.2	175	196	16.2	1.4	13.3	686	248	30.1	5.43	219	9.4
213	1	1	1		56	男	其他原因	是	18	5	有	无	9	好转	33	276	836.36	32	2.4	124	2.6	1.41	-2.5	251	32.4	57.6	421	374	155	6.8	117	3.58	2.21	37	14	74	132	15.9	1.38	17.8	3679	88.94	32	0.38	472	93.4
214					62	女	其他原因	是	24	8	无	有	26	好转	50	67	134	25	4	130	3.9	0.69	-17.5	284	19.1	8.4	83	75	65	7.4	224	2.67	1.62	611	6.3	138	148	16.1	1.39	15.1	642	155.91	37	1.27	48	17.3
215	1	1	1		53	女	高脂血症性	是	11	4	无	无	13	好转	50	112	224	34	5	127	1.4	0.92	-13.4	227	24.7	27.2	25	65	45	8.5	98	12.91	19.41	699	13.6	125	151	19	1.6	18.9	617	188	151.1	1.11	108	1.32
216	1	2		2	65	男	酒精性	是	14	4	无	无	356	不良	50	171	342	48	3.5	147	1.8	0.55	-4.1	198	29.1	18.3	16	25	209	12.2	170	2.45	1.89	16	4.7	69	199	14.7	1.28	16.3	2854	206	33.8	5.21	195	10.2
217					75	女	胆源性	否	15	2	无			不良
218	1	1	1		32	男	高脂血症性	是	12	4	有	无	1	好转	33	83.6	253.33	28.1	4.18	135.2	1.7	0.58	-8.9	200	29.1	14.7	21	28	64.4	5.36	176	5.92	12.23	451	16	195	316	12	1.05	12	15.61	216	33.3	0.98	1325	40.9	1311
219					73	男	胆源性	否	21	4	无			好转
220	1	2		1	30	男	高脂血症性	是	8	3	无	无	7	好转	33	92.1	279.09	34.8	3.2	137.3	1.5	0.71	-6.1	201	33.8	14.7	43	32	52.6	2.59	293	9.44	9.51	93	6.6	169	263	13	1.18	14.7	684	418	33.5	1.97	145	1.6		47.39
221	1	2		1	29	女	高脂血症性	是	3	2	有	无	10	好转	33	95.5	289.39	43.5	3.08	135.7	1	1.06	0.8	188	35.8	18.9	67	24	73.1	2.42	293	9.7	16.62	27	10.8	136	160	12.6	1.11	12.9	416	205	32.8	0.19	246	5.5	466
222					90	女	胆源性	否	26	6	无			不良
223	1	1	1		73	男	胆源性	是	17	5	有	无	3	好转	33	97.5	295.45	24	3.65	134.2	1	0.88	-9.8	207	30.4	22.2	25	43	77	6.96	445	3.23	1.89	98	8	105	238	19.5	1.67	20.2	2753	217	30.1	2.95	199	2.04		100.85	0.02
224	1	1	1		73	男	胆源性	是	10	2	有	无	13	好转	33	69.9	211.82	34.3	5.81	129.8	1.2	0.71	0.5	200	29.1	66.7	39	30	46.4	4.06	71	2.78	0.89	112	10.6	134	71	12.5	1.13	22.4	3009	171.9	30.5	0.52	625	1.6		222.96	0.02
225					21	男	酒精性	是	15	3	有	有	50	好转	50	255	510	18	2.67	144.4	1	1.11	-22.4	334	34.8	16.1	25	27	85.1	5.14	595	5.68	3.85	337	16.1	125	216	13.4	1.21	16.1	1700	111.6	105.8	0.41	211	2.89		0.02
226	1	1	1		36	男	高脂血症性	是	2	2	无	无	8	好转	33	116.9	354.24	35.5	3.76	138.9	1.5	1.08	-5.9	194	41.3	16.7	42	21	80.4	4.72	282	5.83	12.92	1054	14.7	163	156	10.9	0.96	14.3	166	54.8	28.1	0.97	80	12.2	680
227					69	女	其他原因	否	21	2	有			不良
228					27	男	胆源性	是	16	2	无	有	9	好转	21	94	447.62	25	5.7	130	5.1	0.68	-9	122	25.8	16	990	8260	292	13.7	513	1.94	3.16	282	20.2	131	142	12.6	1.1	19.1	2597	291	47.1	1.91	464	25.6
229	1	2		1	24	女	高脂血症性	是	14	3	有	无	12	好转	33	118.7	359.7	36.3	3.38	158.4	1	0.87	-9.3	118.7	35.9	17.2	22	19	59.7	6.3	509	9.12	3.86	76	9.2	115	193	11.4	1.04	16.5	879	73.2	29.2	0.21	414	15.2	484	28.92	0.01
230	1	2		1	50	女	胆源性	是	9	3	无	无	9	好转	40	66.6	166.5	33.9	3.51	133.4	1.1	0.99	0.2	251	27	51.1	20	22	43.4	3.3	49	3.6	2.17	38	12.8	99	192	12.5	1.1	14.7	1981	252.2	31.1	1.07	192	5.3
231	1	2		1	60	女	胆源性	是	18	3	无	无	9	好转	40	93	232.5	27.4	3.06	135.8	2.2	0.86	-10.9	253	23.7	25.4	49	75	71	8.32	198	2.24	1.98	328	24.2	104	30	13.1	1.15	19.2	2464	247	39.8	2.23	159	31.5
232					70	女	高脂血症性	是	17	4	有	有	10	好转	33	101.8	308.48	32.3	3.94	130.2	2.1	0.89	-0.1	200	37.7	20.5	14	48	388.8	15.65	178	4.28	1.09	1299	14.5	106	95	11	0.97	14.6	430	106	27.3	0.41	179	23.1
233					36	男	高脂血症性	是	14	5	有	有	10	好转	40	181.6	454	22.8	3.99	135.2	2	1.03	-18.6	259	32.1	29.3	91	58	100.2	5.29	417	7.76	7.46	303	7.3	137	77	12	1.06	15	729	337.1	27	2.01	446	17.8
234	1	1	1		85	男	胆源性	是	21	4	无	无	14	好转	33	98.5	298.48	30.5	4.39	138.5	1.4	0.6	-7.9	203	34.7	17.4	43	21	122.9	12.12	332	3.31	1.14	523	12.9	115	157	13.8	1.2	15.9	1890	343.2	30.3	6.27	135	1.32
235					74	男	胆源性	否	10	2	有			好转
236	1	2		1	54	女	高脂血症性	是	10	3	有	无	10	好转	50	66.2	132.4	35.8	2.87	136.3	2.1	0.98	-0.7	322	32.6	17.5	106	59	43	2.62	217	4.39	1	401	13.7	120	148	14.2	1.23	19.6	545	327	34.3	0.28	477	8.6		90.41
237	1	1	1		39	女	高脂血症性	是	16	5	有	无	11	好转	21	126.4	601.9	24.4	3.61	137.2	1.4	0.66	-15.9	126	31.6	11.3	30	49	173	6.82	281	14.48	26.51	188	6.9	170	326	12	1.06	13.1	1508	267	28.8	0.3	362	41.8
238					46	男	胆源性	是	19	8	无	有	8	好转	61	101.5	166.39	39.3	5.16	131.7	1	0.86	-7.8	396	25.2	74.4	37	59	378.1	13.84	356	6.07	9.04	624	9.2	117	152	12.5	1.1	13.8	2003	360	29	16.51	287	22.7
239					41	男	高脂血症性	是	18	6	有	有	12	好转	40	140.4	351	31.7	4.16	121.5	5.8	0.51	-13	248	36.2	12.8	34	59	319.7	10.9	726	9.96	15.77	414	7.8	154	309	11	0.97	14.9	3515	438	30.3	0.23	642	24.2	889	82.56
240	1	1	1		34	男	胆源性	是	4	2	无	无	9	好转	50	89.2	178.4	7.45	3.73	133.9	1.1	0.95	-3.2	328	28.4	26.1	72	45	69.6	8.81	303	4.5	3.23	66	15.8	110	166	12.5	1.1	22	3260	130.8	24	1	636	21.5
241	1	2		1	45	男	高脂血症性	是	17	4	有	无	11	好转	33	124.5	377.27	31.4	5.01	134.5	3.6	0.96	-10.6	201	41.7	25.6	45	47	139.3	7.91	415	4.09	1.61	1149	14.9	185	172	18.9	1.64	13.6	1032	384	28	4.64	764	43.4	2279
242					32	男	酒精性	是	17	5	有	有	10	好转	40	152.7	381.75	25.8	3.82	159.9	2.2	1.4	-19.1	253	41.3	14.8	15	21	149.2	11.49	749	13.14	7.31	190	16.1	133	322	11.3	1	15.9	1310	200	25.6	0.41	35	9.6	823	60.64
243	1	1	1		60	男	高脂血症性	是	8	2	无	无	9	好转	37	141.8	383.24	25.7	3.71	134.4	1.1	1.09	-12.3	234	35.5	6.5	13	15	42	2.06	133	15.84	15.4	44	5.7	130	125	10.3	0.94	22	59	33.5	31.2	4.75	80	9.4		6.91
244					72	男	胆源性	否	7	3	无			不良
245					75	女	胆源性	否	19	2	有			好转
246	1	1	1		85	女	酒精性	是	17	4	无	无	9	好转	50	65.8	131.6	40.1	3.29	139.2	2.7	0.96	3	313	25.7	17.8	7	15	53.9	4.98	112	3.41	0.62	53	19.4	114	189	17	1.49	22	2176	137	78.7	0.77	74	27.2
247	1	2		1	51	男	酒精性	是	10	2	无	无	6	好转	21	71.3	339.52	25.3	2.99	134.1	1.1	0.91	-4.3	121	29	35.8	29	44	57.5	4.8	118	3.33	1.47	93	11.2	170	193	11.6	1.04	16.1	2066	232	34.8	4.23	269	22.4
248	1	1	1		52	男	胆源性	是	10	2	有	无	10	好转	40	153	382.5	35.8	3.96	129.9	1.4	1.05	-3.5	249	26.5	17.3	37	28	74	7.04	103	2.46	1.89	3216	27.3	134	188	16	1.4	12.3	1109	380	29.6	1.4	158	45.3
249	1	1	1		39	男	高脂血症性	是	16	3	有	无	79	好转	33	83.7	253.64	37.1	3.8	138.4	1.3	1.04	-3.3	195	32.4	12.5	52	2.33	48.6	4.22	166	7.12	8.66	271	18.8	140	134	11.2	1.02	11.6	381	330.6	28.2	3.39	52	2.33
250					33	女	酒精性	否	7	3	有			不良
251	1	1	1		43	女	高脂血症性	是	3	2	无	无	11	好转	33	69.1	209.39	27	3.94	131.8	2.2	0.59	-11.9	206	30.5	13	19	50	65.9	11.03	381	7.12	8.28	276	11.1	143	302	14.3	1.24	12.9	1209	284	27.4	1.1	208	2.45		56.71
252					51	男	其他原因	否	5	3	有			不良
253	1	1	1		41	男	高脂血症性	是	2	3	无	无	12	好转	33	120.5	365.15	41.9	3.96	135	1.3	1.18	-7.9	188	36.2	31.8	15	24	49.2	4.07	140	5.33	6.4	62	7.2	165	113	11	0.97	12.2	2440	409	30.9	0.06	52	1.25		131.19	0.01
254	1	2		2	44	男	高脂血症性	是	14	3	有	无	38	不良	33	69.8	211.52	40.6	3.29	134.9	1.3	0.75	1.2	192	39.7	16.9	44	32	77.2	2.68	381	8.56	4.56	192	17.9	158	264	11.2	0.98	12	108	240	35.8	4.28	79	9.3	1016	105.08
255					41	男	高脂血症性	否	8	4	有			不良
256	1	1	1		41	男	高脂血症性	是	5	4	无	无	9	好转	33	81.5	246.97	31.1	3.19	135.7	2	1.03	-5.4	202	34.2	15.8	12	31	52.2	1.61	294	9.87	4.43	37	6.8	125	135	10.4	0.95	13.1	1866	207	28.7	0.64	70	1.5		121.88
257	1	1	1		85	女	胆源性	是	16	3	有	无	12	好转	50	69.5	139	31	2.69	134.8	1.6	0.94	-1.5	323	24.4	123.6	132	121	46.6	3.21	79	2.42	0.66	1094	40.7	117	52	16.9	1.48	33.6	14991	294	45	0.41	320	12.5
258	1	1	1		21	女	胆源性	是	10	2	无	无	5	好转	33	114.1	345.76	40.2	3.22	132.4	1.7	0.79	-2.3	189	24.2	5.3	5	19	30.9	0.52	124	2.11	0.47	347	12.9	139	132	14.9	1.31	23.9	2630	162	31.2	3.42	58	22.8
259					43	女	胆源性	否	7	4	无			不良
260	1	2		1	45	女	胆源性	是	5	3	无	无	9	好转	40	100.3	250.75	32.6	3.48	143.1	1.5	1.07	-7.1	244	24	15.4	36	35	44.9	3.22	174	7.75	9.97	328	11.3	114	144	13.3	1.17	22	2637	353	39.6	2.59	292	89.2	2713
261	1	1	1		39	男	高脂血症性	是	14	2	有	无	1	好转	33	83	251.52	35.7	3.68	134.1	2.1	1.13	-2.7	195	49.2	20.4	39	29	91.9	3.5	536	6.06	5.5	311	12.8	151	222	12.1	1.06	12.4	62	176	29	11.84	79	1.79		95.01	0.01
262	1	1	1		47	男	其他原因	是	18	4	无	无	11	好转	60	114	190	38	3.7	138	1.4	0.79	-3	385	22.7	8.5	21	25	60	6.6	93	4.79	5.24	105	8.9	106	101	14	1.25	13.6	2488	236.5	33.6	4.14	128	43
263					87	男	胆源性	否	11	2	无			不良
264	1	1	1		31	男	胆源性	是	8	3	无	无	10	好转	50	67.4	134.8	37.9	3.48	134.8	3.1	0.78	-2	318	38.6	24.8	74	31	71.3	7.47	415	6.83	10.88	53	26.4	164	177	13.1	1.15	13.4	495	126	25	0.5	121	35.4
265	1	2		1	75	女	其他原因	是	14	4	有	无	4	好转	33	78.4	237.58	29.8	4.1	133.9	4.9	0.87	-8.2	202	32.9	26.6	15	25	72.3	5.51	143	2.83	0.83	589	18.4	114	279	13.1	1.15	19.1	428	144	14.8	5.23	105	20.3
266					67	女	胆源性	否	12	3	无			不良
267	1	1	1		33	男	高脂血症性	是	5	3	有	无	10	好转	33	97.4	295.15	36.2	3.4	133.6	1.6	0.73	-5.2	194	34.6	20.7	16	41	67.2	7.63	304	10.44	18.53	210	13.1	176	159	13.3	1.16	12.3	508	308	163	3.64	167	1.63
268					45	男	胆源性	否	6	2	无			不良
269					63	女	酒精性	否	7	3	无			不良
270	1	1	1		89	男	其他原因	是	15	2	有	无	16	好转	40	99.3	248.25	40.6	3.66	138.5	1.9	1.06	-0.3	169	35.7	26.2	373	307	103.7	4.73	227	2.86	0.22	811	9.9	137	202	11.4	1.01	15.9	1818	49.6	30.6	6.06	48	6.3
271	1	1	1		27	男	高脂血症性	是	9	3	无	无	11	好转	33	157.5	477.27	36.9	4.89	131.4	2.6	0.8	-6.6	195	32.8	14.9	41	31	97.7	6.12	251	3.78	5.43	467	11.2	196	300	13.4	1.18	20.1	755	208	43.3	2.16	174	46.3
272	1	1	1		55	男	酒精性	是	7	3	无	无	11	好转	40	68.2	170.5	35.9	3.39	132	1.1	0.95	-1	247	30.9	9	14	29	62	3.3	225	3.25	0.77	56	18.9	125	208	14	1.21	17.8	903	135	39.6	8.89	398	13.4
273					52	男	胆源性	否	35	4	有			不良
274	1	1	1		38	女	酒精性	是	6	3	无	无	8	好转	45	145.6	323.56	38.4	3.42	135.3	1.2	0.87	-1.8	279	26.4	55.7	30	54	44	3.78	168	6.71	6.51	224	8.5	93	255	15.4	1.33	24.4	9144	452	52.4	0.93	273	14.2			0.01
275	1	1	1		20	男	高脂血症性	是	6	2	有	无	10	好转	33	168	509.09	22	3	135	3	1.02	-11.5	209	42.1	7.2	4	16	34	3.3	61	18.41	10.62	1128	11.1	181	203	16	1.4	13.1	321	105	34.3	10	103	11
276	1	2		1	45	男	酒精性	是	7	2	无	无	10	好转	21	119	566.67	37	3	128	1	0.63	1.1	119	27.2	31.3	44	78	51	2.3	70	2.51	0.77	595	9.5	127	114	14.7	1.3	32.4	1327	245	36.9	0.24	158	3.1
277	1	2		1	65	男	胆源性	是	20	5	无	无	17	好转	40	79.4	198.5	22.4	3.02	151.3	4.7	0.83	-3.8	262	31.6	46.2	143	57	93.4	9.79	194	4.45	6.13	305	8.3	88	189	19.3	1.73	27.3	7216	57	30.5	0.23	361	28.5		71.86	0.03
278	1	1	1		50	女	胆源性	是	7	4	有	无	9	好转	33	99.6	301.82	37.4	4.02	135.2	3	0.9	-4.9	195	28.9	21	11	22	139.1	7.82	363	3.46	4.31	279	9.5	134	1789	12.1	1.1	14.9	1391	196	35	4.28	103	0.49		300
279	1	1	1		31	男	高脂血症性	是	7	4	无	无	9	好转	33	60.9	184.55	31.9	3.2	135	2.8	0.84	-1.6	139	37.9	19.6	29	31	64.5	3.47	444	4.53	6.4	208	9.5	162	219	12.3	1.12	14.9	358	401	29.4	0.39	195	10.2		68.5
280					36	女	高脂血症性	否	12	2	无			好转
281	1	1	1		56	男	其他原因	是	8	2	有	无	2	好转	33	146.5	443.94	36.2	2.98	131.8	1.3	0.77	2.2	279	34	40	33	55	63.8	5.28	204	3.2	0.79	133	10.2	112	172	11.9	1.04	13.6	999	352	30.8	5.06	803	30.2		123.49
282	1	2		1	19	女	高脂血症性	是	6	4	有	无	9	好转	33	113.1	342.73	39.8	3.78	140.9	1.3	1.1	-1.2	190	39.7	19.7	36	29	17.6	2.63	343	8.6	17.97	67	8.9	151	316	11.4	1	33.5	65	84.6	32	4.39	427	5
[truncated: 8 more columns]
